# Supplementary material
Source: Springer Nature journal article supplement (https://www.springermedizin.de/resource/supplementary/13006_2013_165_MOESM1_ESM.pdf/9628112)

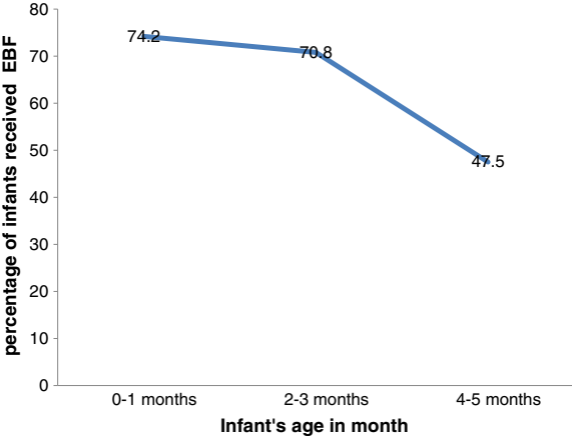

Supplement: MOESM1 [file 9628112]
